## Correction

## Correction: Regorafenib in combination with silybin as a novel potential strategy for the treatment of metastatic colorectal cancer

Valentina Belli<sup>1</sup>, Vincenzo Sforza<sup>1</sup>, Claudia Cardone<sup>1</sup>, Erika Martinelli<sup>1</sup>, Giusi Barra<sup>2</sup>, Nunzia Matrone<sup>1</sup>, Stefania Napolitano<sup>1</sup>, Floriana Morgillo<sup>1</sup>, Concetta Tuccillo<sup>3</sup>, Alessandro Federico<sup>3</sup>, Marcello Dallio<sup>3</sup>, Carmelina Loguercio<sup>3</sup>, Antonietta Gerarda Gravina<sup>3</sup>, Raffaele De Palma<sup>2</sup>, Fortunato Ciardiello<sup>1</sup> and Teresa Troiani<sup>1</sup>

<sup>1</sup>Oncologia Medica, Dipartimento di Internistica Clinica e Sperimentale "F. Magrassi", Università degli Studi della Campania "Luigi Vanvitelli", Napoli, Italy

<sup>2</sup>Medicina Interna, Dipartimento di Internistica Clinica e Sperimentale "F. Magrassi", Università degli Studi della Campania "Luigi Vanvitelli", Napoli, Italy

<sup>3</sup>Gastroenterologia, Dipartimento di Internistica Clinica e Sperimentale "F. Magrassi", Università degli Studi della Campania "Luigi Vanvitelli", Napoli, Italy

Published: August 29, 2025

Copyright: © 2025 Belli et al. This is an open access article distributed under the terms of the [Creative Commons Attribution License](https://creativecommons.org/licenses/by/4.0/) (CC BY 4.0), which permits unrestricted use, distribution, and reproduction in any medium, provided the original author and source are credited.

**This article has been corrected:** In Figure 3B, the caspase 3 blot in the SW-48 column is an accidental duplicate of the caspase 3 blot in the HC-15 column. The corrected Figure 3B, obtained using the original data, is shown below. The authors declare that these corrections do not change the results or conclusions of this paper.

Original article: Oncotarget. 2017; 8:68305–68316. <https://doi.org/10.18632/oncotarget.20054>

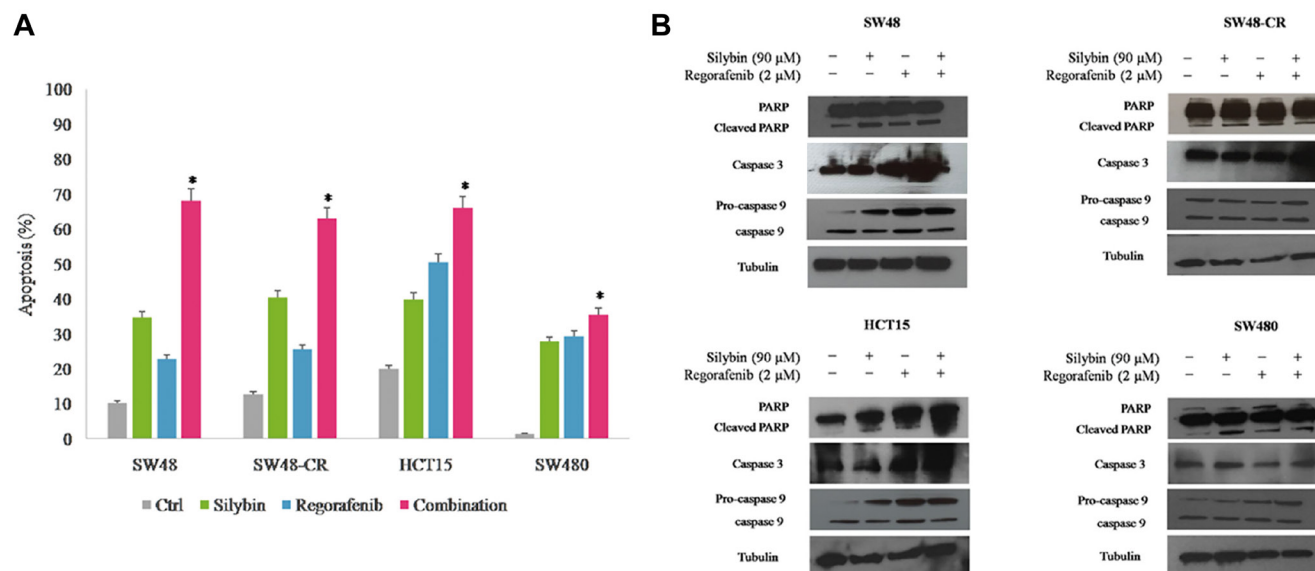

**Figure 3: Effects of regorafenib in combination with silybin on induction of apoptosis in SW48, SW48-CR, HCT15 and SW480 colon cancer cells.** (A) Apoptosis was evaluated with Annexin-V-FITC staining and 7-Amino-Actinomycin D (7-AAD) detection assays using flow cytometry in SW48, SW48-CR, HCT15 and SW480 cancer cells after 24 hours of incubation with silybin (90 μM) or regorafenib (2 μM) and their combination. Histogram of data expressed as percentage of apoptotic cells. \* $p < 0.05$  compared to single treatment. (B) Colon cancer cells were treated with silybin (90 μM) or regorafenib (2 μM) and their combination for 24 hours. Expression of PARP, caspase 3 and 9 were evaluated by immunoblotting as described in Materials and Methods.  $\alpha$ -Tubulin was used as the loading control.
